# Supplementary material
Source: Springer Nature journal article supplement (https://www.springermedizin.de/resource/supplementary/13054_2013_2943_MOESM3_ESM.pdf/9711674)

**Percentage of Respondents**

30  
25  
20  
15  
10  
5  
0

More information

Relaxation techniques

Stay with patient

Sleeping pill

Psychological counselling

Religious counselling

Other medication

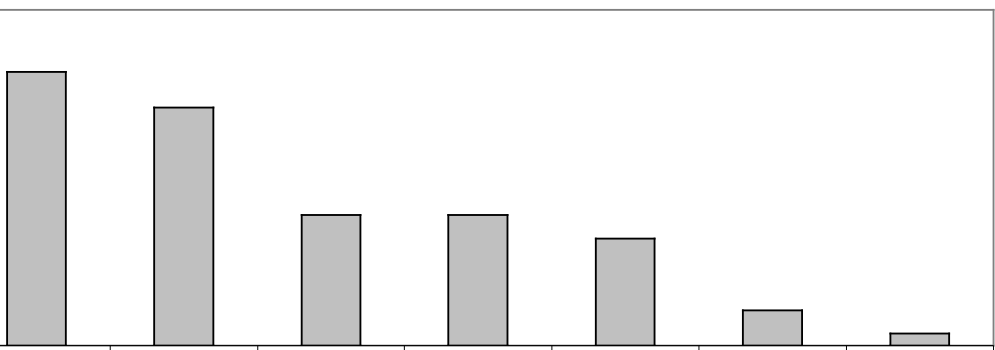

Supplement: MOESM3 [file 9711674]
